# Supplementary material
Source: Springer Nature journal article supplement (https://www.springermedizin.de/resource/supplementary/12889_2011_3830_MOESM2_ESM.pdf/9490622)
Supplement: MOESM2 [file 9490622]

Materialism  
Poverty

Breakdown of Dyadic Relationship  
Neglect of Children  
Disregard of Elderly

Depression  
Psychopathology  
Ill Health

Happiness  
Harmony  
&  
Health

Intergenerational Connection

Negative Outcomes
